# Supplementary material for: Associations between activity patterns and cardio-metabolic risk factors in children and adolescents: A systematic review
Source: PubMed Central journal article supplement (PMC6095515; doi:10.1371/journal.pone.0201947), 2018-08-16
Supplement: pone.0201947.s001.pdf [file pone.0201947.s001.pdf]

**S1 Table. Systematic search strategy: Associations between activity patterns and cardio-metabolic risk factors in children and adolescents: A systematic review (PICO principle [30]).**

|                              |                           |                                                                                                                                                                                                                                                             |
|------------------------------|---------------------------|-------------------------------------------------------------------------------------------------------------------------------------------------------------------------------------------------------------------------------------------------------------|
| <b>Population</b>            | <b>Child*</b>             | OR Kid* OR Youth OR Adolescen* OR Teen* OR Student* OR Juvenile* OR "Young person" OR "Young people" OR "Primary school*" OR "Secondary school*" OR "High school*" OR "Elementary school*"                                                                  |
| <b>Intervention/Exposure</b> | <b>"Physical* activ*"</b> | OR Exercis* OR Sedentar* OR Sitting OR Standing OR "Aerobic activ*" OR "Energy expenditure"                                                                                                                                                                 |
|                              | <b>Objective*</b>         | OR Observ* OR Acceleromet* OR Inclinometer OR Pedometer OR SenseWear OR CSA OR MTI OR ActiGraph OR ActivPal OR GENEactiv OR Minimitter OR "Mini-Mitter" OR IDEEA OR Caltrac OR Actiheart                                                                    |
|                              | <b>Pattern*</b>           | OR Bout* OR Break* OR Period* OR "Within-Day" OR "Between-Day" OR Segments OR Transitions or "Time Use"                                                                                                                                                     |
|                              | <b>Guideline*</b>         | OR Recommendation*                                                                                                                                                                                                                                          |
| <b>Comparator</b>            | <b>NA</b>                 | NA                                                                                                                                                                                                                                                          |
| <b>Outcome</b>               | <b>Health</b>             | OR "Risk Factor*"                                                                                                                                                                                                                                           |
|                              | <b>Cardiometabolic</b>    | OR Insulin OR Glucose OR Metabolic OR "Syndrome X" OR "Deadly Quartet" OR Plurimetabolic OR Blood OR Cholesterol* OR Hypercholesterol* OR "Blood pressure" OR Hypertension OR Triglycerid* OR Lipid* OR Dyslipid* OR Inflamm* OR Cardiovascular OR Diabetes |
|                              | <b>Obes*</b>              | OR Adiposity OR Overweight OR "Body fat" OR "Body composition" OR "Waist circumference" OR "Skin fold*" OR "Body mass index" OR "Hip circumference" OR BMI OR "Bio-impedance analysis" OR "Dual-energy x-ray absorptiometry" OR DXA OR DEXA                 |
|                              | <b>Fitness</b>            | OR Cardiorespiratory OR Musc* OR Strength OR Endurance OR Conditioning                                                                                                                                                                                      |

|                                                                                                                                                                                                                                                                                                                                                                                                                                                                                                                                                                                                                                                                                                                                                                                                                                                                                                                                                                                                                                                                                                                                                                                                                                                                                                                                                                                                                                                                                                                                                                                                                                                                       |                                                                                                                             |
|-----------------------------------------------------------------------------------------------------------------------------------------------------------------------------------------------------------------------------------------------------------------------------------------------------------------------------------------------------------------------------------------------------------------------------------------------------------------------------------------------------------------------------------------------------------------------------------------------------------------------------------------------------------------------------------------------------------------------------------------------------------------------------------------------------------------------------------------------------------------------------------------------------------------------------------------------------------------------------------------------------------------------------------------------------------------------------------------------------------------------------------------------------------------------------------------------------------------------------------------------------------------------------------------------------------------------------------------------------------------------------------------------------------------------------------------------------------------------------------------------------------------------------------------------------------------------------------------------------------------------------------------------------------------------|-----------------------------------------------------------------------------------------------------------------------------|
| <b>NOT Statement</b>                                                                                                                                                                                                                                                                                                                                                                                                                                                                                                                                                                                                                                                                                                                                                                                                                                                                                                                                                                                                                                                                                                                                                                                                                                                                                                                                                                                                                                                                                                                                                                                                                                                  | Animal* OR rat* OR mouse OR mice (TITLE-ABS-KEY)                                                                            |
| <b>Total search</b>                                                                                                                                                                                                                                                                                                                                                                                                                                                                                                                                                                                                                                                                                                                                                                                                                                                                                                                                                                                                                                                                                                                                                                                                                                                                                                                                                                                                                                                                                                                                                                                                                                                   | (( S1 AND S2 AND S3 AND S4 ) AND ( S5 OR S6 OR S7 OR S8 OR S9 )) AND NOT TITLE-ABS-KEY ( animal* OR rat* OR mouse OR mice ) |
| <p><b>Limiters for date, language and human studies</b></p> <p>Limiters - Published Date: 1980/01/01 – 2017/10/31</p> <p>Language (Dutch/Flemish, English): Academic search complete, Education Source, Medline Complete.</p> <p>Studies (Human): Global health (Broad cat: Human Sciences).</p>                                                                                                                                                                                                                                                                                                                                                                                                                                                                                                                                                                                                                                                                                                                                                                                                                                                                                                                                                                                                                                                                                                                                                                                                                                                                                                                                                                      |                                                                                                                             |
| <p><b>Search Strategy</b></p> <p>( TITLE-ABS-KEY ( "Physical* activ*" OR exercis* OR sedentar* OR sitting OR standing OR "Aerobic activ*" OR "Energy expenditure" ) AND TITLE-ABS-KEY ( child* OR kid* OR youth OR adolescen* OR teen* OR student* OR juvenile* OR "Young person" OR "Young people" OR "Primary school*" OR "Secondary school*" OR "High school*" OR "Elementary school*" ) AND TITLE-ABS-KEY ( objective* OR observ* OR acceleromet* OR inclinometer OR pedometer OR sensewear OR csa OR mti OR ActiGraph OR activpal OR geneactiv OR minimitter OR "Mini-Mitter" OR ideaa OR caltrac OR actiheart ) AND TITLE-ABS-KEY ( pattern* OR bout* OR break* OR period* OR "Within-Day" OR "Between-Day" OR segments OR transitions OR "Time Use" ) AND TITLE-ABS-KEY ( health OR "Risk Factor*" ) OR TITLE-ABS-KEY ( cardiometabolic OR insulin OR glucose OR metabolic OR "Syndrome X" OR "Deadly Quartet" OR plurimetabolic OR blood OR cholesterol* OR hypercholesterol* OR "Blood pressure" OR hypertension ) OR TITLE-ABS-KEY ( triglycerid* OR lipid* OR dyslipid* OR inflamm* OR cardiovascular OR diabetes ) OR TITLE-ABS-KEY ( obes* OR adiposity OR overweight OR "Body fat" OR "Body composition" OR "Waist circumference" OR "Skin fold*" OR "Body mass index" OR "Hip circumference" OR bmi OR "Bio-impedance analysis" OR "Dual-energy x-ray absorptiometry" ) OR TITLE-ABS-KEY ( dxa OR dexa ) OR TITLE-ABS-KEY ( fitness OR cardiorespiratory OR musc* OR strength OR endurance OR conditioning ) OR TITLE-ABS-KEY ( guideline* OR recommendation* ) AND NOT TITLE-ABS-KEY ( animal* OR rat* OR mouse OR mice ) ) AND PUBYEAR &gt; 1979</p> |                                                                                                                             |

**References** (*reference numbers correspond with manuscript*)

30. Deeks JJ, Higgins JPT, Altman DG. 5.1.1 Rationale for well-formulated questions. In: Higgins JPT, Green S, editors. *Cochrane Handbook for Systematic Reviews of Interventions*. 5.1.0 ed. London: The Cochrane Collaboration; 2011.
