# Supplementary material for: Associations between activity patterns and cardio-metabolic risk factors in children and adolescents: A systematic review
Source: PubMed Central journal article supplement (PMC6095515; doi:10.1371/journal.pone.0201947), 2018-08-16
Supplement: pone.0201947.s003.pdf [file pone.0201947.s003.pdf]

**S3 Table. Overview of characteristics of included studies (PICO principle [30]).**

| <b>PICO:</b>                 | <b>Population</b> |                     |          |                        |                        | <b>Intervention/Exposure</b> |                  |                                         |                                                     |                                                                                                                                         | <b>Outcome</b>                                                |                                               |                                                                                     |                  |
|------------------------------|-------------------|---------------------|----------|------------------------|------------------------|------------------------------|------------------|-----------------------------------------|-----------------------------------------------------|-----------------------------------------------------------------------------------------------------------------------------------------|---------------------------------------------------------------|-----------------------------------------------|-------------------------------------------------------------------------------------|------------------|
| <b>Reference<sup>A</sup></b> | <b>Design</b>     | <b>Country</b>      | <b>N</b> | <b>Sex<sup>B</sup></b> | <b>Age (mean ± SD)</b> | <b>Device/ Method</b>        | <b>Epoch (s)</b> | <b>Intensity thresholds (METs)</b>      | <b>Accelerometer cut-points (cpm)<sup>C</sup></b>   | <b>Patterns</b>                                                                                                                         | <b>Health outcomes</b>                                        | <b>Significant findings</b>                   | <b>Adjustments</b>                                                                  | <b>ROB score</b> |
| <b>Altenburg (2015) [33]</b> | CS                | Europe <sup>D</sup> | 647      | Mixed                  | 11.6 ± 0.8             | AG, At                       | 15/60            | N/R                                     | SED <100<br>MVPA ≥3000                              | SED: Time spent in ≥5, ≥10, ≥20, ≥30-min bouts                                                                                          | BMI, WC, C-peptide, glucose, HDL-C, LDL-C, TC, TG, CMR-score  | BMI (D), WC (D), C-peptide (D), CMR-score (D) | Age, sex, MVPA, wear time, country. Fasting blood levels: additionally WC.          | Med risk         |
| <b>Bailey (2017) [34]</b>    | CS                | UK                  | 111      | Mixed                  | 11.8 ± 1.4             | RT3                          | 60               | SED <1.5                                | SED <420<br>LPA 420-1859<br>MVPA ≥1860              | SED: Frequency of ≥20-min bouts and breaks & mean duration of ≥20-min bouts and breaks                                                  | WC, glucose, TC, HDL-C, TG, SBP, DBP, CMR-score (2x), fitness | TG (D), CMR-score (D)                         | Sex, ethnicity, SED, MVPA, wear time.                                               | Med risk         |
| <b>Belcher (2015) [35]</b>   | EXP               | USA                 | 28       | Mixed                  | 10.2 ± 1.5             | % of VT                      | N/A              | N/A                                     | N/A                                                 | SED: 180 min uninterrupted vs. breaks every 30 min                                                                                      | C-peptide, glucose, insulin, TG, FFA, cortisol                | C-peptide (B), glucose (B), insulin (B)       | Baseline serum values, age, sex, BF, randomization order, visit condition, puberty. | Med risk         |
| <b>Blaes (2011) [56]</b>     | CS                | France              | 187      | Boys <sup>E</sup>      | 9.1 ± 1.3              | AG                           | 5                | LPA <3<br>MPA 3-6<br>VPA 6-9<br>VHPA >9 | LPA <162<br>MPA 163-440<br>VPA 441-790<br>VHPA >790 | LPA: Frequency of 5-15, 16-30, 31-60 s, 1-3, 3-10 and >10-min bouts<br>VPA/VHPA: Frequency of 5-15, 16-30, 31-60 s, 1-3, 3-10-min bouts | BF                                                            | BF (B)                                        | Age and BF.                                                                         | Med risk         |

|                              |          |           |      |          |                      |    |    |                                                            |                                                      |                                                                                                                              |                                    |                         |                                                                                               |          |
|------------------------------|----------|-----------|------|----------|----------------------|----|----|------------------------------------------------------------|------------------------------------------------------|------------------------------------------------------------------------------------------------------------------------------|------------------------------------|-------------------------|-----------------------------------------------------------------------------------------------|----------|
| <b>Carson (2011) [36]</b>    | CS       | USA       | 2527 | Mixed    | 13 ± 4.5             | AG | 60 | MVPA >4                                                    | SED <100<br>LPA Freedson<br>MVPA<br>Freedson         | SED: Time spent in ≥30-min bouts and % of bout time spent in breaks                                                          | WC, CRP, non HDL-C, CMR-score, SBP | NS                      | Age, sex, ethnicity, SES, smoking, BF, fat, saturated fat, dietary cholesterol, sodium, MVPA. | Med risk |
| <b>Carson (2014) [37]</b>    | CS       | Canada    | 787  | Mixed    | 11.1 ± 0.7           | AG | 5  | MVPA >4                                                    | SED ≤100<br>LPA, MVPA<br>Freedson                    | SED: Time spent in 1-4, 5-9, 10-19, 20-29, ≥30-min bouts & frequency of breaks/hr for total week, week day and weekend days. | BMI                                | BMI (D)                 | Age, sex, SES. SED patterns: additionally MVPA. SED breaks and MVPA: additionally SED.        | Low risk |
| <b>Colley (2013) [38]</b>    | CS       | Canada    | 1608 | Separate | 6-19 (mean ± SD N/R) | Ac | 60 | SED <1.5                                                   | SED ≤100<br>MVPA ≥1500                               | SED: Time spent in ≥20, ≥40, ≥60, ≥80, ≥100, ≥120-min bouts & frequency of breaks                                            | BMI, WC, non HDL, DBP, SBP         | BMI (D), WC (B), WC (D) | Age, MVPA, wear time.                                                                         | Med risk |
| <b>Dorsey (2011) [39]</b>    | CS       | USA       | 106  | Mixed    | 9.4 ± 0.9            | Ac | 15 | N/R                                                        | SED <100<br>LPA 100-900<br>MPA 900-2200<br>VPA ≥2200 | VPA: Time spent in <1, 1-2, ≥ 2-min                                                                                          | BMI                                | BMI (B)                 | Age, sex, type of day.                                                                        | Med risk |
| <b>Dowd (2014) [40]</b>      | CS       | Ireland   | 195  | Girls    | 15.7 ± 0.9           | aP | 15 | SED <1.5<br>MVPA ≥3<br>LPA = 24h – SED – MVPA <sup>F</sup> | MVPA ≥11988                                          | SED: % time in <30, >30-min bouts & frequency of breaks                                                                      | BMI, skinfolds                     | BMI (B)                 | Age, clustering of participants within schools, MVPA.                                         | Low risk |
| <b>Fletcher (2017a) [41]</b> | CS       | USA       | 1797 | Mixed    | 15.1 ± 2.2           | AG | 60 | SED <1.5                                                   | SED ≤100                                             | SED: Median bout length                                                                                                      | BMI, CMR-score                     | NS                      | Age, sex, ethnicity, SES, dietary intake, MVPA.                                               | Med risk |
| <b>Fletcher (2017b) [42]</b> | CS, LONG | Australia | 140  | Mixed    | 12.9 ± 0.2           | AG | 60 | SED <1.5                                                   | SED ≤100                                             | SED: Median bout length                                                                                                      | BMI                                | NS                      | Age, sex, SES, puberty, MVPA.                                                                 | Med risk |

|                               |     |                     |      |       |            |                   |     |                               |                                              |                                                                                       |                                                                                                                                             |                                                                                                          |                                                                                   |           |
|-------------------------------|-----|---------------------|------|-------|------------|-------------------|-----|-------------------------------|----------------------------------------------|---------------------------------------------------------------------------------------|---------------------------------------------------------------------------------------------------------------------------------------------|----------------------------------------------------------------------------------------------------------|-----------------------------------------------------------------------------------|-----------|
| <b>Fletcher (2017c) [50]</b>  | EXP | Australia           | 13   | Mixed | 16.4 ± 1.3 | Standard exercise | N/A | N/A                           | N/A                                          | SED: 360 min uninterrupted vs. 2-min activity breaks every 18 min                     | Glucose                                                                                                                                     | Glucose (B)                                                                                              | -                                                                                 | High risk |
| <b>Gabel (2016) [14]</b>      | CS  | Australia           | 164  | Mixed | 8.7 ± 0.4  | AG                | 15  | SED <1.5<br>MPA 4-6<br>VPA ≥6 | SED ≤100<br>MVPA<br>Freedson                 | SED: Time spent in 5-10 and >10-min bouts & frequency of 5-10, >10-min bouts & breaks | Adiponectin, BDNF, CRP, HOMA-IR, IL-2, IL-6, IL-8, IL-10, PAI-1, resistin, sE-selectin, sICAM-1, sVCAM-1, TNF-α                             | NS                                                                                                       | Clustering within schools, sex, WC, MVPA, diet density.                           | Low risk  |
| <b>Garaulet (2016) [43]</b>   | CS  | Europe <sup>D</sup> | 1044 | Mixed | 14.5 ± 1.2 | AG                | 15  | N/R                           | MVPA >2000                                   | Fragmentation( Frequency of changes between high and low activity)                    | BMI, WC, waist-to-height ratio, skinfolds (2x), BF (4x), HDL-C, LDL-C, TC, TG, glucose, HOMA-IR, insulin, DBP, SBP, Fitness, CMR-score (2x) | BMI (B), WC (B), waist-to-height ratio (B), BF (B), skinfolds (B), HDL-C (D), Fitness (D), CMR-score (D) | Age, sex, SES.                                                                    | Med risk  |
| <b>Harrington (2013) [51]</b> | CS  | USA                 | 55   | Mixed | 8          | AG                | 2   | LPA <3<br>MPA 3-6             | LPA Freedson<br>MPA Freedson<br>VPA Freedson | MVPA: Frequency of 5-min bouts                                                        | BMI                                                                                                                                         | NS                                                                                                       | -                                                                                 | Med risk  |
| <b>Holman (2011) [44]</b>     | CS  | USA                 | 2754 | Mixed | 13 ± 4.5   | AG                | 60  | MVPA ≥4                       | MVPA<br>Freedson                             | MVPA: Time spent in 1-4, ≥5, 1-9, ≥10-min bouts                                       | WC, CRP, non HDL-C, CMR-score, SBP                                                                                                          | WC (B), CRP (B), CMR-score (B), SBP (B)                                                                  | Sex, age, ethnicity, SES, diet (total fat and sodium), smoking status, wear time. | Med risk  |

|                               |          |             |          |          |                |         |     |                                            |                                                              |                                                                     |                                            |                      |                                                                             |           |
|-------------------------------|----------|-------------|----------|----------|----------------|---------|-----|--------------------------------------------|--------------------------------------------------------------|---------------------------------------------------------------------|--------------------------------------------|----------------------|-----------------------------------------------------------------------------|-----------|
| <b>Júdice (2017) [60]</b>     | CS       | Portugal    | 2698     | Mixed    | 13.4 ± 2.3     | AG      | 60  | N/R                                        | SED <100<br>LPA 100-2295<br>MVPA ≥2296                       | SED:<br>Frequency of <30 min, ≥30-min bouts and breaks              | BMI, Fitness                               | BMI (B), Fitness (B) | SED, sex, age, season of data collection.                                   | Low risk  |
| <b>Kwon (2013) [57]</b>       | CS       | USA         | 554      | Separate | 8, 11, 13,15   | AG      | 60  | N/R                                        | SED <100<br>MVPA ≥2296                                       | SED:<br>Frequency of breaks                                         | BF                                         | BF (B)               | Age, body size, physical maturity.                                          | High risk |
| <b>Mann (2017) [45]</b>       | CS, LONG | UK          | 502 (BL) | Mixed    | 7.5 ± 0.5 (BL) | AG      | 15  | NR                                         | SED <100<br>MVA ≥2400                                        | SED:<br>Frequency of ≥1-min bouts                                   | BMI, BF                                    | BF (D)               | SED (within the pattern variable, divided by SED hours), sex, MVPA, season. | Low risk  |
| <b>Mark (2009) [46]</b>       | CS       | USA         | 2498     | Mixed    | 12.7 ± 2.8     | AG      | 60  | MVPA ≥3                                    | MVPA ≥3000                                                   | MVPA: Time spent in 1-4, 5-9, ≥10-min bouts                         | BMI                                        | BMI (B)              | Sex, age, ethnicity, SES.                                                   | Med risk  |
| <b>McManus (2015) [52]</b>    | EXP      | Canada      | 9        | Girls    | 9.4 ± 0.78     | % of VT | N/A | N/A                                        | N/A                                                          | SED: 180 min uninterrupted vs. 10-min breaks every 60 min           | Superficial femoral artery parameters (6x) | NS                   | -                                                                           | High risk |
| <b>Nettlefold (2012) [47]</b> | CS       | Canada      | 105      | Mixed    | 9.9 ± 0.6      | AG      | 15  | SED <1.5<br>LPA 1.5-3<br>MPA 3-6<br>VPA ≥6 | SED Freedson<br>LPA Freedson<br>MPA Freedson<br>VPA Freedson | MVPA: Time spent in 0-5, 5-10, 10-20, ≥20-min bouts                 | LAC, SAC                                   | NS                   | Body surface area, SBP, BMI, sex.                                           | High risk |
| <b>Oliver (2013) [53]</b>     | CS       | New Zealand | 126      | Mixed    | 5.9 ± N/R      | Ac      | 60  | N/R                                        | SED <100<br>MVPA ≥1500                                       | SED:<br>Frequency, average duration and average intensity of breaks | WC                                         | NS                   | -                                                                           | Med risk  |
| <b>Ross (2015) [54]</b>       | EXP      | New Zealand | 12       | Mixed    | 11.5 ± 1.57    | aP      | N/R | N/R                                        | N/R                                                          | SED: 360 min uninterrupted vs. 4-min MPA breaks every 30 min        | TG                                         | NS                   | -                                                                           | High risk |

|                              |     |        |     |          |            |                            |     |                                         |                                                                          |                                                                                                                                  |                                                             |                                                        |                                                                  |           |
|------------------------------|-----|--------|-----|----------|------------|----------------------------|-----|-----------------------------------------|--------------------------------------------------------------------------|----------------------------------------------------------------------------------------------------------------------------------|-------------------------------------------------------------|--------------------------------------------------------|------------------------------------------------------------------|-----------|
| <b>Saunders (2013a) [48]</b> | EXP | Canada | 19  | Mixed    | 12.2 ± 1.1 | % of VO <sub>2</sub> -peak | N/A | N/A                                     | N/A                                                                      | SED: 8 hours uninterrupted sitting vs. 2-min activity breaks every 20 min vs. 2-min activity breaks every 18 min + 2x20 min MVPA | Glucose, insulin, HDL-C, LDL-C, TG                          | NS                                                     | Condition, age, sex, BMI, WC, Tanner stage, baseline PA and SED. | Med risk  |
| <b>Saunders (2013b) [59]</b> | CS  | Canada | 522 | Separate | 9.2 ± N/R  | AG                         | 60  | SED <1.5                                | LPA 100-2296<br>MVPA >2296                                               | SED: Frequency of 1-4, 5-9, 10-14, 15-29 and ≥30 min-bouts & breaks                                                              | BMI, WC, CRP, glucose, insulin, HDL-C, TG, CMR-score        | BMI (B), BMI (D), WC (B), CRP (B), glucose (D), TG (B) | Wear time, age, LPA, MVPA, SED, BMI, puberty, SES.               | High risk |
| <b>Stone (2009) [55]</b>     | CS  | UK     | 47  | Boys     | 9.4 ± 0.7  | AG                         | 2   | MPA 4-6<br>VPA >6                       | SED <300<br>LPA 300-3581<br>MPA 3581-6130<br>VPA 6130-9630<br>VHPA >9630 | LPA, MPA, VPA, VHPA: Frequency, intensity & time spent in ≥4-s & ≥5-min bouts                                                    | WC, ACh peak, ACh AUC, VO <sub>2</sub> -peak                | WC (B), ACh peak (B), VO <sub>2</sub> -peak (B)        | -                                                                | High risk |
| <b>Thomas (2009) [49]</b>    | CS  | USA    | 32  | Mixed    | 16.0 ± 1.6 | AG                         | 60  | LPA <3<br>MPA 3-6<br>VPA 6-9<br>VHPA ≥9 | LPA ≤ 1952<br>MPA 1953-5724<br>VPA 5725-9498<br>VHPA ≥9499               | MVPA: Frequency of 5-min bouts of MVPA                                                                                           | K <sub>g</sub>                                              | K <sub>g</sub> (B)                                     | Race, sex, BF.                                                   | High risk |
| <b>Willis (2015) [58]</b>    | CS  | USA    | 391 | Mixed    | 7.6 ± 0.6  | AG                         | 60  | N/R                                     | MVPA Freedson                                                            | MVPA: Comparing 3 classes identified based on the composition of <5, 5-10, ≥10-min bouts/day                                     | BMI, WC, glucose, insulin, HDL-C, TC, TG, DBP, SBP, fitness | BMI (B), WC (B)                                        | Age, sex, BMI, MVPA.                                             | High risk |

Abbreviations; *CS* Cross-sectional, *EXP* Experimental, *LONG* Longitudinal, *N* sample size, *cpm* count per min, *min* min, *s* Seconds, *AG* ActiGraph, *At* Actitrainer, *Ac* Actical, *aP* activPAL, *VO<sub>2</sub>-peak* Maximal oxygen uptake, *VT* Ventilatory Threshold, *PA* physical activity, *SED* sedentary time, *LPA* light physical activity, *MPA* Moderate Physical Activity, *MVPA* Moderate-to-Vigorous physical activity, *VPA* Vigorous Physical Activity, *VHPA* Very High Physical Activity, *N/R* not reported, *N/A* not applicable, *B* Beneficial association reported, *D* Detrimental association reported, *NS* No significant results, *BMI* Body Mass Index, *BF* Body fat, *WC* Waist circumference, *ACh* Acetylcholine, *AUC* Area Under Curve, *BDNF* Brain-derived neurotrophic factor, *CRP* C-reactive protein, *FFA* Free fatty acids, *K<sub>g</sub>* Intravenous glucose intolerance, *HOMA-IR* Homeostatic Model Assessment (-Insulin Resistance), *IL* interleukin, *PAI* Plasminogen activator inhibitor, *sICAM* Soluble intercellular adhesion molecule, *sVCAM* Soluble Vascular Cell Adhesion Molecule, *TG* Triglycerides, *TNF* Tumor Necrosis Factor, *HDL-C* High Density Lipoprotein Cholesterol, *LDL-C* Low Density Lipoprotein Cholesterol, *TC* Total cholesterol, *CV* Cardiovascular, *LAC* Large Artery compliance, *SAC* Small Artery Compliance, *DBP* Diastolic Blood Pressure, *SBP* Systolic Blood Pressure, *BL* Baseline, *Med* Medium, *Freedson* Age-specific cut-points as developed by Freedson and colleagues [75].

<sup>A</sup> Only name of first author mentioned in table; <sup>B</sup> Mixed: Data were analysed for boys and girls together; Separate: Both sexes were tested and reported separately; Boys: Sample only consisted of boys; Girls: Sample only consisted of girls; <sup>C</sup> Cut-off points given in epochs were calculated to counts per minute; <sup>D</sup> Participants included were from multiple European countries; <sup>E</sup> Initial analyses (total volumes) were separately done for boys and girls. Activity pattern analyses were only done for boys, which are the only used results in the current systematic review; <sup>F</sup> LPA was calculated including and excluding standing time using the activPAL posture measures.

## References *(reference numbers correspond with manuscript)*

14. Gabel L, Ridgers ND, Della Gatta PA, Arundell L, Cerin E, Robinson S, et al. Associations of sedentary time patterns and TV viewing time with inflammatory and endothelial function biomarkers in children. *Pediatr Obes.* 2016;11(3):194-201. doi: 10.1111/ijpo.12045. PubMed PMID: 26097139.
30. Deeks JJ, Higgins JPT, Altman DG. 5.1.1 Rationale for well-formulated questions. In: Higgins JPT, Green S, editors. *Cochrane Handbook for Systematic Reviews of Interventions.* 5.1.0 ed. London: The Cochrane Collaboration; 2011.
33. Altenburg TM, de Niet M, Verloigne M, De Bourdeaudhuij I, Androustos O, Manios Y, et al. Occurrence and duration of various operational definitions of sedentary bouts and cross-sectional associations with cardiometabolic health indicators: the ENERGY-project. *Prev Med.* 2015;71:101-6. doi: 10.1016/j.ypmed.2014.12.015. PubMed PMID: 25535676.
34. Bailey DP, Charman SJ, Ploetz T, Savory LA, Kerr CJ. Associations between prolonged sedentary time and breaks in sedentary time with cardiometabolic risk in 10–14-year-old children: The HAPPY study. *J Sports Sci.* 2017;35(22):2164-71. doi: 10.1080/02640414.2016.1260150.
35. Belcher BR, Berrigan D, Papachristopoulou A, Brady SM, Bernstein SB, Brychta RJ, et al. Effects of interrupting children's sedentary behaviors with activity on metabolic function: A randomized trial. *J Clin Endocrinol Metab.* 2015;100(10):3735-43. doi: 10.1210/jc.2015-2803. PubMed PMID: 26312582; PubMed Central PMCID: PMC4596047.
36. Carson V, Janssen I. Volume, patterns, and types of sedentary behavior and cardio-metabolic health in children and adolescents: A cross-sectional study. *BMC Health.* 2011;11(247):1-10. doi: 10.1186/1471-2458-11-274. PubMed Central PMCID: PMCDec 5.
37. Carson V, Stone M, Faulkner G. Patterns of sedentary behavior and weight status among children. *Pediatr Exerc Sci.* 2014;26(1):95-102. doi: 10.1123/pes.2013-0061. PubMed PMID: 24092774.
38. Colley RC, Garriguet D, Janssen I, Wong SL, Saunders TJ, Carson V, et al. The association between accelerometer-measured patterns of sedentary time and health risk in children and youth: Results from the Canadian Health Measures Survey. *BMC Public Health.* 2013;13(200):9. doi: 10.1186/1471-2458-13-200.
39. Dorsey KB, Herrin J, Krumholz HM. Patterns of moderate and vigorous physical activity in obese and overweight compared with non-overweight children. *Int J Pediatr Obes.* 2011;6(2):E547-E55. doi: 10.3109/17477166.2010.490586. PubMed PMID: 20883127; PubMed Central PMCID: PMC3815589.
40. Dowd KP, Harrington DM, Hannigan A, Donnelly AE. Light-intensity physical activity is associated with adiposity in adolescent females. *Med Sci Sports Exerc.* 2014;46(12):2295-300. doi: 10.1249/MSS.0000000000000357. PubMed PMID: 24797308.

41. Fletcher EA, Carson V, McNaughton SA, Dunstan DW, Healy GN, Salmon J. Does diet mediate associations of volume and bouts of sedentary time with cardiometabolic health indicators in adolescents? *Obesity*. 2017a;25(3):591-9. doi: 10.1002/oby.21750.
42. Fletcher EA, Lamb KE, McNaughton SA, Garnett SP, Dunstan DW, Baur LA, et al. Cross-sectional and prospective mediating effects of dietary intake on the relationship between sedentary behaviour and body mass index in adolescents. *BMC Public Health*. 2017b;17(1):1-10. doi: 10.1186/s12889-017-4771-0.
43. Garaulet M, Martinez-Nicolas A, Ruiz JR, Konstabel K, Labayen I, González-Gross M, et al. Fragmentation of daily rhythms associates with obesity and cardiorespiratory fitness in adolescents: The HELENA study. *Clin Nutr*. 2016. doi: 10.1016/j.clnu.2016.09.026. PubMed PMID: 27890490.
44. Holman RM, Carson V, Janssen I. Does the fractionalization of daily physical activity (sporadic vs. bouts) impact cardiometabolic risk factors in children and youth? *PLoS One*. 2011;6(10):7. doi: 10.1371/journal.pone.0025733. PubMed PMID: 21998688.
45. Mann KD, Howe LD, Basterfield L, Parkinson KN, Pearce MS, Reilly JK, et al. Longitudinal study of the associations between change in sedentary behavior and change in adiposity during childhood and adolescence: Gateshead Millennium Study. *IJO*. 2017;41(7):1042-7. doi: 10.1038/ijo.2017.69.
46. Mark AE, Janssen I. Influence of bouts of physical activity on overweight in youth. *Am J Prev Med*. 2009;36(5):416-21. doi: 10.1016/j.amepre.2009.01.027. PubMed PMID: 19362696.
47. Nettlefold L, McKay HA, Naylor PJ, Bredin SS, Warburton DE. The relationship between objectively measured physical activity, sedentary time, and vascular health in children. *Am J Hypertens*. 2012;25(8):914-9. doi: 10.1038/ajh.2012.68. PubMed PMID: 22673018.
48. Saunders TJ, Chaput JP, Goldfield GS, Colley RC, Kenny GP, Doucet E, et al. Prolonged sitting and markers of cardiometabolic disease risk in children and youth: A randomized crossover study. *Metabolism*. 2013a;62(10):1423-8. doi: 10.1016/j.metabol.2013.05.010. PubMed PMID: 23773981.
49. Thomas AS, Greene LF, Ard JD, Oster RA, Darnell BE, Gower BA. Physical activity may facilitate diabetes prevention in adolescents. *Diabetes Care*. 2009;32(1):9-13. doi: 10.2337/dc08-0780. PubMed PMID: 18840771; PubMed Central PMCID: PMC2606821.
50. Fletcher EA, Salmon J, McNaughton SA, Orellana L, Wadley GD, Bruce C, et al. Effects of breaking up sitting on adolescents' postprandial glucose after consuming meals varying in energy: A cross-over randomised trial. *J Sci Med Sport*. 2017c:1-6. doi: 10.1016/j.jsams.2017.06.002.
51. Harrington SA. Relationships of objectively measured physical activity and sleep with BMI and academic outcomes in 8-year-old children. *Appl Nurs Res*. 2013;26(2):63-70. doi: 10.1016/j.apnr.2013.02.001. PubMed PMID: 23583266.



52. McManus AM, Ainslie PN, Green DJ, Simair RG, Smith K, Lewis N. Impact of prolonged sitting on vascular function in young girls. *Exp Physiol*. 2015;100(11):1379-87. doi: 10.1113/EP085355. PubMed PMID: 26370881.
53. Oliver M, Schluter PJ, Healy GN, Tautolo E, Schofield G, Rush E. Associations between breaks in sedentary time and body size in Pacific mothers and their children: Findings from the Pacific Islands Families Study. *J Phys Act Health*. 2013;10(8):1166-74.
54. Ross K, Hinckson E, Zinn C. Effect of intermittent sitting time on acute postprandial lipemia in children. *J Clin Transl Endocrinol*. 2015;2(2):72-6. doi: 10.1016/j.jcte.2015.03.003.
55. Stone MR, Rowlands AV, Middlebrooke AR, Jawis MN, Eston RG. The pattern of physical activity in relation to health outcomes in boys. *Int J Pediatr Obes*. 2009;4(4):306-15.
56. Blaes A, Baquet G, Fabre C, Van Praagh E, Berthoin S. Is there any relationship between physical activity level and patterns, and physical performance in children? *Int J Behav Nutr Phys Act*. 2011;8(122):1-8. doi: 10.1186/1479-5868-8-122. PubMed PMID: 22053790; PubMed Central PMCID: PMCDec 5.
57. Kwon S, Burns TL, Levy SM, Janz KF. Which contributes more to childhood adiposity-high levels of sedentarism or low levels of moderate-through-vigorous physical activity? The Iowa Bone Development Study. *J Pediatr*. 2013;162(6):1169-74. doi: 10.1016/j.jpeds.2012.11.071. PubMed PMID: 23305957; PubMed Central PMCID: PMCPMC3664130.
58. Willis EA, Ptomey LT, Szabo-Reed AN, Honas JJ, Lee J, Washburn RA, et al. Length of moderate-to-vigorous physical activity bouts and cardio-metabolic risk factors in elementary school children. *Prev Med*. 2015;73(1):76-80. doi: 10.1016/j.ypmed.2015.01.022. PubMed PMID: 25647532; PubMed Central PMCID: PMCPMC4455886.
59. Saunders TJ, Tremblay MS, Mathieu ME, Henderson M, O'Loughlin J, Tremblay A, et al. Associations of sedentary behavior, sedentary bouts and breaks in sedentary time with cardiometabolic risk in children with a family history of obesity. *PLoS One*. 2013b;8(11):e79143. doi: 10.1371/journal.pone.0079143. PubMed PMID: 24278117; PubMed Central PMCID: PMCPMC3835898.
60. Júdice PB, Silva AM, Berria J, Petroski EL, Ekelund U, Sardinha LB. Sedentary patterns, physical activity and health-related physical fitness in youth: A cross-sectional study. *Int J Behav Nutr Phys Act*. 2017;14(1). doi: 10.1186/s12966-017-0481-3.
75. Freedson P, Pober D, Janz KF. Calibration of Accelerometer Output for Children. *Med Sci Sports Exerc*. 2005;37(Supplement):S523-S30. doi: 10.1249/01.mss.0000185658.28284.ba (*reference not used in manuscript*).
